# Supplementary material for: Effects and costs of real-time cardiac telerehabilitation: randomised controlled non-inferiority trial
Source: PubMed Central journal article supplement — Heart. 2018 Aug 27;105(2):122–9. doi: 10.1136/heartjnl-2018-313189 (PMC6352408; doi:10.1136/heartjnl-2018-313189), 2018-08-27
Supplement: heartjnl-2018-313189supp001.pdf [file heartjnl-2018-313189supp001.pdf]

## ONLINE SUPPLEMENT

### Supplement 1. Itemised delivery costs for the REMOTE-CR (intervention, N = 82) and centre-based (control, N = 80) programmes

#### REMOTE-CR (intervention)

| Item                                 | Unit costs and assumptions                                                                            | Cost NZD (GBP)       | Cost %        |
|--------------------------------------|-------------------------------------------------------------------------------------------------------|----------------------|---------------|
| <b>Equipment</b>                     |                                                                                                       |                      |               |
| Wearable sensors                     | NZD800 per unit. 20 units. 40% annual asset depreciation over $\approx 2$ y study period <sup>a</sup> | 10240 (5194)         | 10.86         |
| Smartphones                          | NZD260 per unit, 20 units. No asset depreciation <sup>a</sup>                                         | 5200 (2637)          | 5.52          |
| Remote monitoring computer           | NZD1500. 40% annual asset depreciation, study period $\approx 2$ years <sup>a</sup>                   | 960 (487)            | 1.02          |
| <b>Occupancy</b>                     |                                                                                                       |                      |               |
| Office lease                         | NZD500 per month. 85 weeks                                                                            | 9917 (5030)          | 10.52         |
| Utilities                            | NZD16.67 per month. 85 weeks                                                                          | 331 (168)            | 0.35          |
| <b>Salaries</b>                      |                                                                                                       |                      |               |
| exCR specialist                      | NZD35 per hour. 15 hours per week. 85 weeks                                                           | 44625 (22634)        | 47.34         |
| Administration                       | NZD26.20 per hour. 1.5 hour per participant                                                           | 3223 (1635)          | 3.42          |
| Recruitment                          | NZD26.20 per hour. 2 hours per week. 78 weeks                                                         | 2069 (1049)          | 2.19          |
| Training, participants               | NZD26.20 per hour. 0.25 hours per participant                                                         | 537 (272)            | 0.57          |
| Training, exCR specialist            | NZD26.20 per hour. 0.25 hours per specialist                                                          | 7 (4)                | 0.01          |
| Baseline exercise test               | NZD150 per test                                                                                       | 12300 (6239)         | 13.05         |
| <b>Other</b>                         |                                                                                                       |                      |               |
| Phone & internet                     | NZD90 per month. 85 weeks.                                                                            | 1785 (905)           | 1.89          |
| Mobile data plans                    | NZD6 per month. 3 months per participant                                                              | 1476 (749)           | 1.57          |
| Internet server hosting              | NZD50 per month. 85 weeks                                                                             | 992 (503)            | 1.05          |
| Stationary & postage                 | NZD3.00 per participant. Stationery & postage                                                         | 246 (125)            | 0.26          |
| Advertising flyer                    | Proportionate printing cost                                                                           | 334 (169)            | 0.35          |
| Information sheet printing           | NZD0.05 per page. 5 pages.                                                                            | 21 (11)              | 0.02          |
| <b>Total programme delivery cost</b> |                                                                                                       | <b>94263 (47811)</b> | <b>100.00</b> |

**Centre-based (control)**

| <b>Item</b>                                  | <b>Unit costs and assumptions</b>             | <b>Cost NZD (GBP)</b>  | <b>Cost %</b> |
|----------------------------------------------|-----------------------------------------------|------------------------|---------------|
| Equipment                                    |                                               |                        |               |
| Exercise equipment                           | NZD63900 per year <sup>b</sup>                | 104452 (52978)         | 37.45         |
| Occupancy                                    |                                               |                        |               |
| Lease + utilities                            | NZD54000 per year <sup>b</sup>                | 88269 (44770)          | 31.65         |
| Salaries                                     |                                               |                        |               |
| exCR specialist                              | NZD35 per hour. 15 hours per week. 85 weeks   | 44625 (22634)          | 16.00         |
| Recruitment                                  | NZD26.20 per hour. 2 hours per week. 78 weeks | 2018 (1024)            | 0.72          |
| Baseline exercise test                       | NZD150 per test                               | 12000 (6086)           | 4.30          |
| Other                                        |                                               |                        |               |
| Administration, consumables & communications | NZD 340 per participant                       | 27200 (13796)          | 9.75          |
| Advertising flyer                            | Proportionate printing cost                   | 326 (165)              | 0.12          |
| Information sheet printing                   | NZD0.05 per page. 5 pages.                    | 20 (10)                | 0.01          |
| <b>Total programme delivery cost</b>         |                                               | <b>278910 (141462)</b> | <b>100.00</b> |

<sup>a</sup>Depreciation calculated as per New Zealand Inland Revenue IR265, General Depreciation Rates 2017. <sup>b</sup>100% cost allocation to control programme as occupancy & equipment costs were required to maintain service operability irrespective of participant numbers. Total programme delivery period = 85 weeks (21.3 months). Cost data extracted from project records. Costs reported in New Zealand dollars (NZD) with indicative Pound Sterling equivalents (GBP) for the 2014 reference year.

**Supplement 2. Self-reported adverse events during the REMOTE-CR (intervention, N = 82) and centre-based (control, N = 80) programmes**

|                           | REMOTE-CR |         | Centre-based |         |
|---------------------------|-----------|---------|--------------|---------|
|                           | Week 12   | Week 24 | Week 12      | Week 24 |
| Event classification      |           |         |              |         |
| Non-serious               | 9         | 6       | 3            | 8       |
| Death                     | 0         | 0       | 0            | 0       |
| Life-threatening          | 0         | 1       | 2            | 0       |
| Hospitalisation           | 2         | 4       | 0            | 1       |
| Persistent incapacity     | 1         | 0       | 0            | 0       |
| Congenital Abnormality    | 0         | 0       | 0            | 0       |
| Medically important event | 6         | 2       | 1            | 1       |
| Total events              | 18        | 13      | 6            | 10      |
| Severity                  |           |         |              |         |
| Mild                      | 8         | 6       | 1            | 5       |
| Moderate                  | 10        | 6       | 2            | 5       |
| Severe                    | 0         | 1       | 3            | 0       |
| Relationship to treatment |           |         |              |         |
| Unrelated                 | 13        | 11      | 5            | 10      |
| Possible                  | 2         | 1       | 1            | 0       |
| Probably                  | 2         | 0       | 1            | 0       |
| Definite                  | 1         | 0       | 0            | 0       |

Adverse events included any self-reported change in health state between baseline assessment and 24-week follow-up.
